# Supplementary material for: Redox regulation of RAD51 Cys319 and homologous recombination by peroxiredoxin 1
Source: PubMed Central journal article supplement — Redox Biol. 2022 Aug 24;56:102443. doi: 10.1016/j.redox.2022.102443 (PMC9450138; doi:10.1016/j.redox.2022.102443), 2022-08-24
Supplement: mmc1.pdf [file mmc1.pdf]

## Supplemental Figure S1. RAD51 Cys319 has reactive nucleophilic characteristics

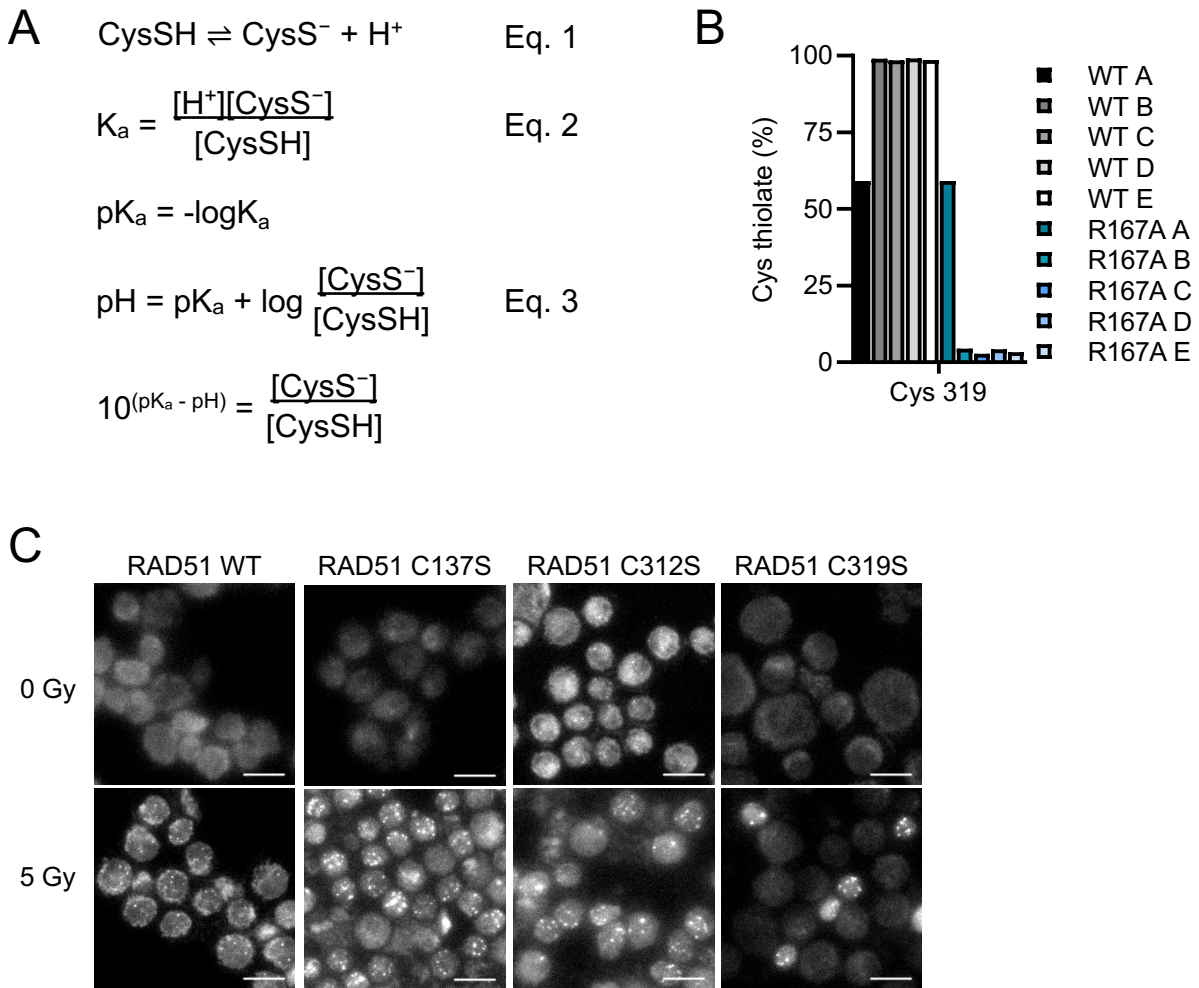

**Supplemental Figure S1.** RAD51 Cys319 has reactive nucleophilic characteristics. (A) Equations for deprotonation of cysteine (Eq. 1), the acid dissociation constant of cysteine  $K_a$ , with  $[\text{H}^+]$ ,  $[\text{CysS}^-]$  and  $[\text{CysSH}]$  at equilibrium concentrations (Eq. 2) and the Henderson-Hasselbalch (Eq. 3). (B) Cys thiolate levels were calculated using  $\text{p}K_a$  values determined by PropKa from the Cryo-EM structure of human RAD51 (PDB:5NP7) on single-stranded DNA and the Henderson-Hasselbalch equation. (C) RAD51 foci formation was decreased in DT40 cells harboring RAD51 C319S protein following IR with 5 Gy. IF images of RAD51 DT40 cells transduced with WT or cysteine mutant RAD51 expression constructs processed 4 h following IR with 5 Gy. Scale bar 10  $\mu\text{m}$ .

## Supplemental Figure S2. Cys319Ser RAD51 cells exhibit diminished proliferation and CRISPR C319S RAD51 cells have smaller colonies in soft agar

A

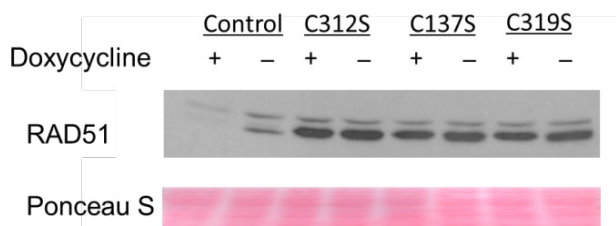

B

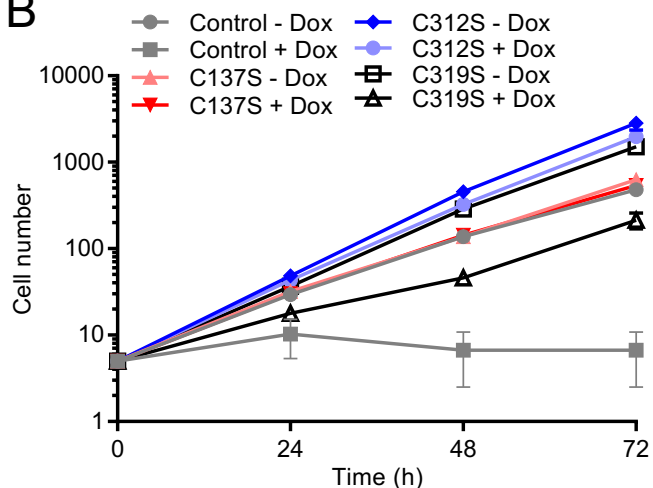

C

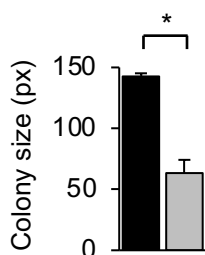

**Supplemental Figure S2.** Cys319Ser RAD51 cells exhibit diminished proliferation and CRISPR C319S RAD51 cells have smaller colonies in soft agar. (A) Expression of RAD51 protein in Tet-off RAD51 DT40 cells is indicated for RAD51 mutants. (B) Dox-dependent knockdown of RAD51 in DT40 cells suppressed proliferation in control Tet-repressed DT40 cells (●) and DT40 cells harboring human RAD51 C319S (Δ), but not DT40 cells transduced with RAD51 C137S (▼) or C312S (◆) mutant expression constructs. Raw cell number counts are indicated over 72 h. (C) Soft agar colony formation assays were performed of RAD51 WT MM231 or CRISPR/Cas-9 homozygous Cys319Ser RAD51 mutated cells by plating 1000 cells in soft agar and measuring colony size after 4 weeks. Values indicate mean ± SEM, n=3.

**Supplemental Figure S3. No disulfide between PRDX1 and RAD51 was detected and loss PRDX1 increases RAD51 sulfenylation**

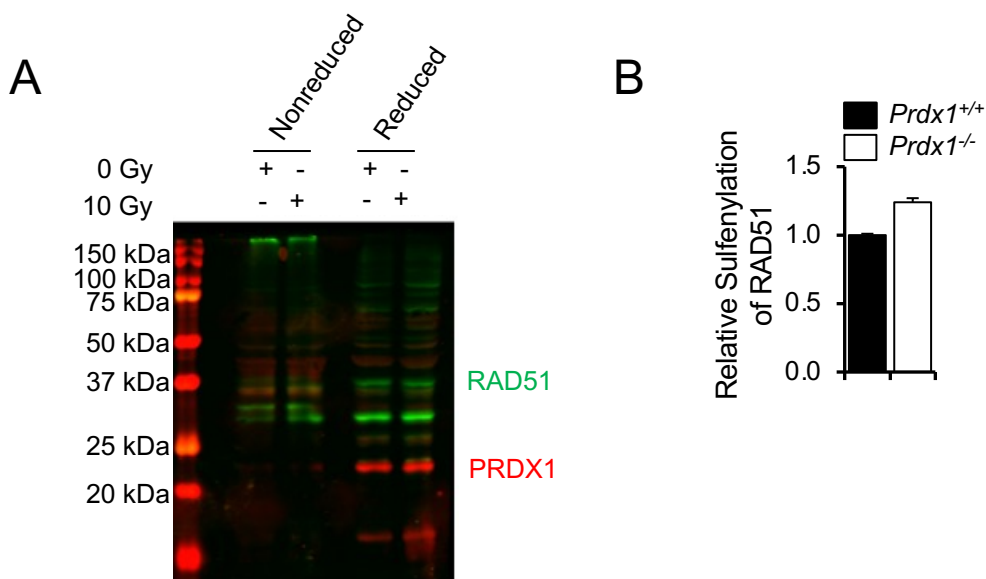

**Supplemental Figure S3.** (A) MCF10A cells were treated with 0 or 10 Gy and formation and separated under nonreducing or reducing conditions and immunoblotted for PRDX1 and RAD51. No disulfide bond was observed following irradiation. (B) *Prdx1*<sup>-/-</sup> MEFs were found to have increased levels of sulfenylated RAD51 relative to *Prdx1*<sup>+/+</sup> MEFs as measured by DAz-2 incorporation. MEFs were transduced with a RAD51 expression construct and treated with DAz-2 (5 mM) for 1.5 h. DAz-2 incorporation was detected by chemiluminescence by utilizing ligation of p-biotin and binding of streptavidin-HRP.

## Supplemental Figure S4. PRDX1-deficiency sensitizes cells to IR and inhibits both HR and RAD51 foci formation

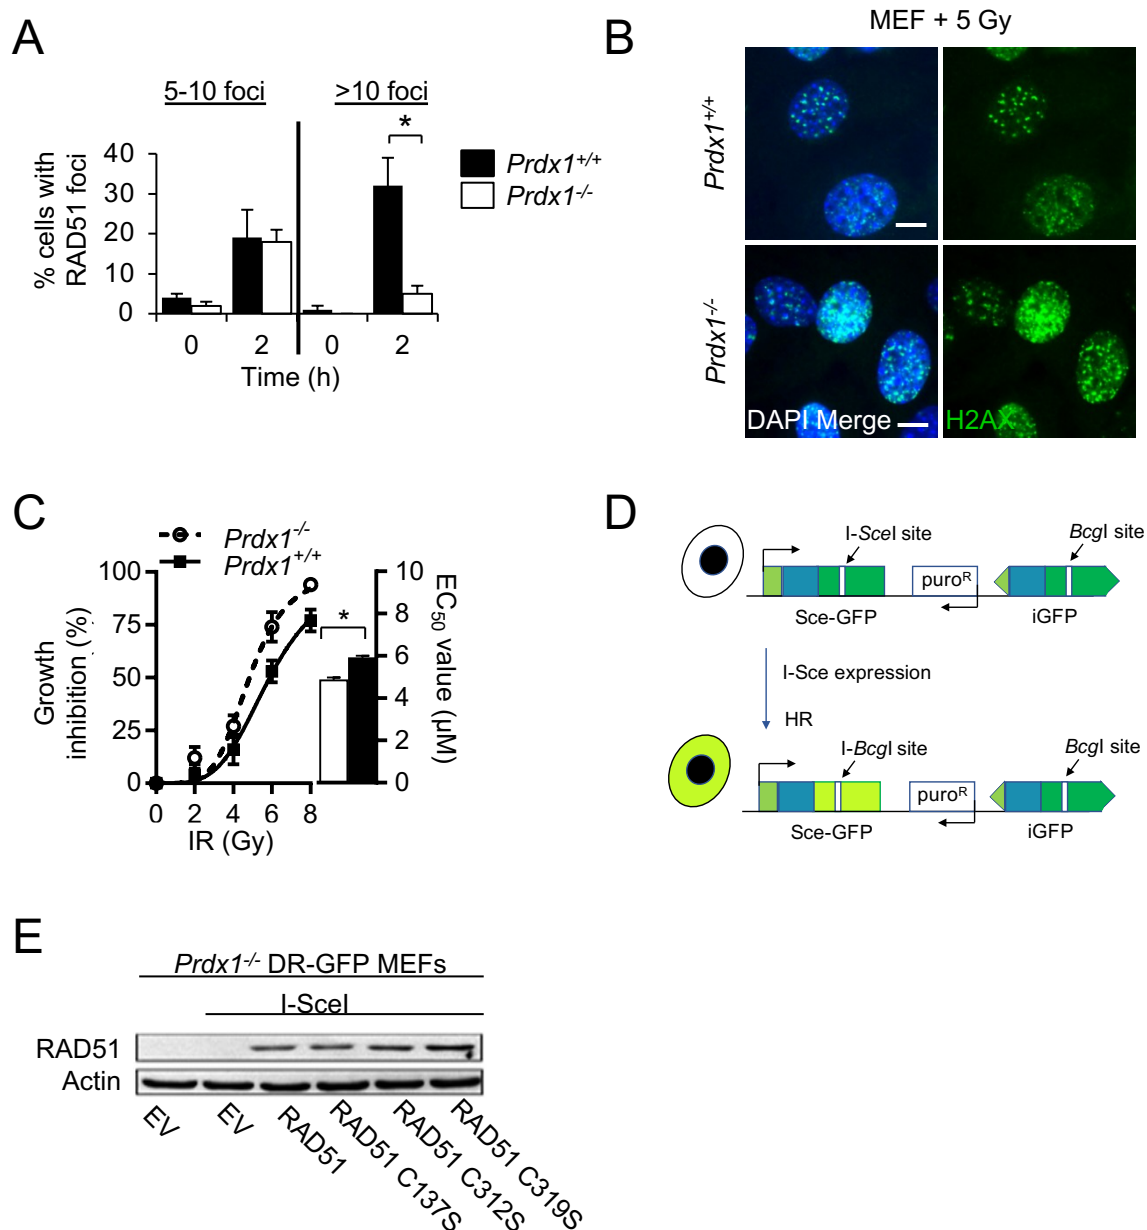

**Supplemental Figure S4.** PRDX1-deficiency sensitizes cells to IR and inhibits both HR and RAD51 foci formation. (A) PRDX1 deficiency decreased RAD51 foci formation when challenged with IR. *Prdx1*<sup>+/+</sup> (black bars) or *Prdx1*<sup>-/-</sup> (white bars) MEFs underwent IR with 0 or 5 Gy and RAD51 foci were counted after 2 h. RAD51 foci were binned into 5-10 foci or >10 foci. (B) PRDX1 deficiency increased  $\gamma$ H2AX when irradiated with 5 Gy. IF images of *Prdx1*<sup>+/+</sup> or *Prdx1*<sup>-/-</sup> MEFs stained with  $\gamma$ H2AX antibody post-IR with 5 Gy. Scale bar indicates 10  $\mu$ m. (C) *Prdx1*<sup>-/-</sup> MEFs are more sensitive to IR when compared to *Prdx1*<sup>+/+</sup> MEFs. Clonogenic growth inhibition was measured in *Prdx1*<sup>+/+</sup> (■) or *Prdx1*<sup>-/-</sup> (○) MEFs following increasing doses of  $\gamma$ -IR. (D) DR-GFP assay for homologous-directed recombination of a modified tandem GFP reporter, which contains two differently mutated GFP cDNA fragments. Transient I-SceI expression initiates a DSB at the GFP I-SceI site. Repair of the DSB by a non-crossover gene conversion downstream of the second GFP cDNA fragment results in reconstitution of a functional GFP coding sequence with loss of the I-SceI site and gain of a Bcgl site. (E) HR was decreased in *Prdx1*<sup>-/-</sup> MEFs harboring a DR-GFP reporter that expressed RAD51 C319S protein following DSB induced by I-SceI. Relative protein levels are indicated of *Prdx1*<sup>-/-</sup> MEFs transduced with WT or cysteine mutant RAD51 expression constructs transfected with I-SceI.

**Supplemental Figure S5. PRDX1-deficiency sensitizes breast cancer cells to IR and diminishes RAD51 foci intensity**

**A**

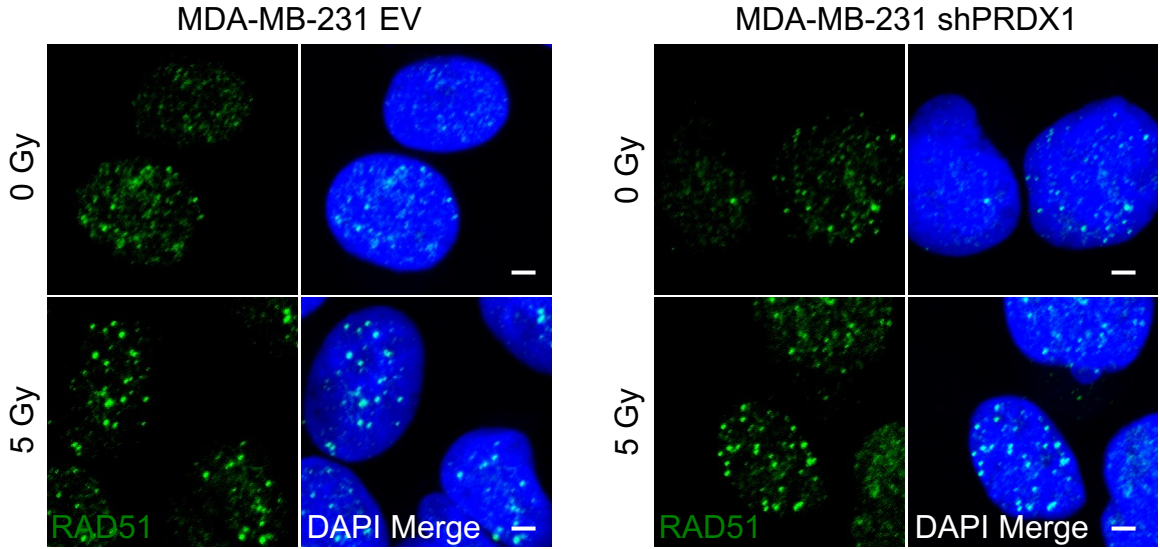

**B**

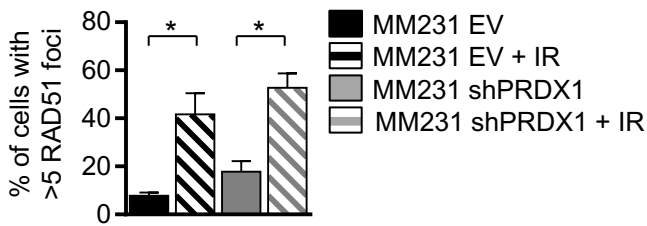

**C**

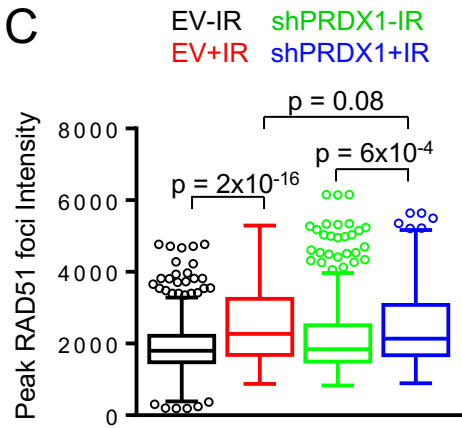

**D**

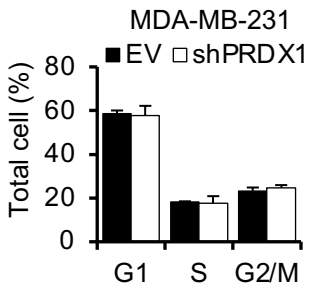

**Supplemental Figure S5. PRDX1-deficiency sensitizes breast cancer cells to IR and diminishes RAD51 foci intensity.** (A) MDA-MB-231 infected with shPRDX1 or EV expression vectors dosed with 0 or 5 Gy. Cells plated on 16-well coverslips were dosed with 0 or 5 Gy then processed for IF 6 hours later. Representative IF images are shown. Pseudo-coloring of RAD51 (green) and merged samples include DAPI stained nuclei (blue). Scale bar indicates 5  $\mu$ m. (B) The mean percentages of cells with 5 or more RAD51 foci from confocal z-stacked images are indicated from PRDX1-proficient (black) or deficient (gray) samples following treatment with 0 (solid) or 5 Gy (striped) + SEM. (C) Box and whiskers plot of peak RAD51 foci intensity values of PRDX1-deficient (— or —) or proficient (— or —) MDA-MB-231 cells in the presence or absence of 5 Gy from more than 20 cells per group. (D) Flow cytometric analysis of propidium iodide stained breast cancer cells that were proficient or deficient in PRDX1 displayed a similar cell cycle profile. Mean  $\pm$  SEM, n=3

### Supplemental Table S1.

| MDA-MB-231               | p-value                 |
|--------------------------|-------------------------|
| EV vs. shPRDX1           | 0.627                   |
| EV vs. EV + IR           | $< 2.2 \times 10^{-16}$ |
| shPRDX1 vs. shPRDX1 + IR | 0.000583                |
| EV + IR vs. shPRDX1 + IR | 0.084                   |

**Supplemental Table S1.** IR enhanced RAD51 peak foci intensity more significantly in MDA-MB-231 EV cells compared to MDA-MB-231 shPRDX1 cells. MDA-MB-231 EV or MDA-MB-231 shPRDX1 cells were plated on coverslips and dosed with 0 or 5 Gy then processed for IF 6 hours later. RAD51 peak foci intensities from confocal z-stacked images from more than 20 cells per group were measured with MATLAB from 3 independent experiments. IR enhanced RAD51 peak foci intensity more significantly in MM231 EV cells compared to MDA-MB-231 shPRDX1 cells.
